# Supplementary material for: Niobate-based lead-free piezoceramics: a diffused phase transition boundary leading to temperature-insensitive high piezoelectric voltage coefficients
Source: Royal Society of Chemistry journal article supplement (doi:10.1039/c7tc04813k), 2018-01-01
Supplement: c7tc04813k1.pdf [file c7tc04813k1.pdf]

*Supporting Information*

**Niobate Based Lead-Free Piezoceramics: Diffused Phase Transition  
Boundary Leading to Temperature-Insensitive High Piezoelectric Voltage  
Coefficient**

Qing Liu,<sup>a</sup> Jing-Feng Li,<sup>\*a</sup> ,Lei Zhao,<sup>a</sup> Yichi Zhang,<sup>a</sup> Jing Gao,<sup>a</sup> Wei Sun,<sup>a</sup> Ke Wang and Longtu Li,<sup>a</sup>

<sup>a</sup>. State Key Laboratory of New Ceramics and Fine Processing, School of Materials Science and Engineering,  
Tsinghua University, Beijing, 100084, P. R. China

\*Email: jingfeng@mail.tsinghua.edu.cn (Jing-Feng Li)

## I. Phase structure

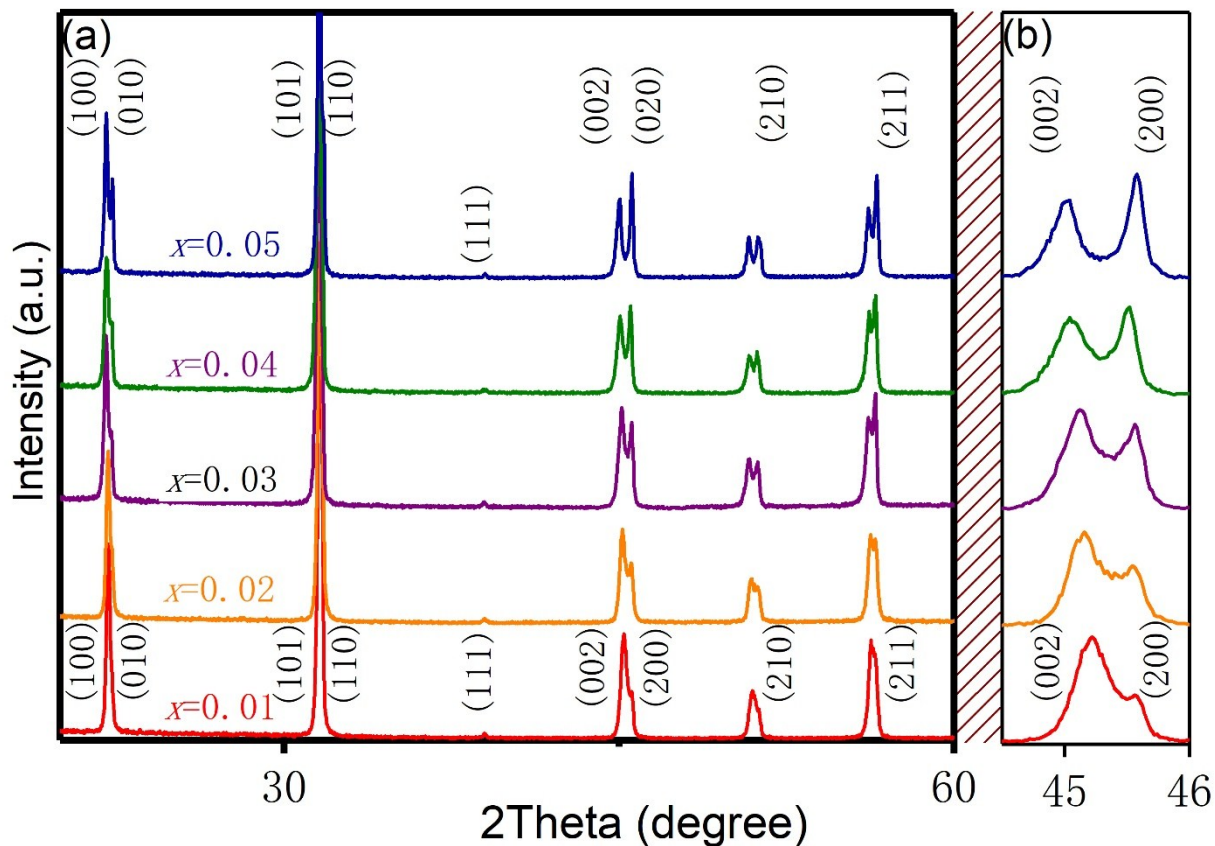

**Fig. S1** Room temperature XRD patterns of the  $L_x\text{KNN-6.5BZ-1BNT}$  samples

## II. Mechanical property of $L_{0.02}\text{KNN-6.5BZ-1BNT}$ sample

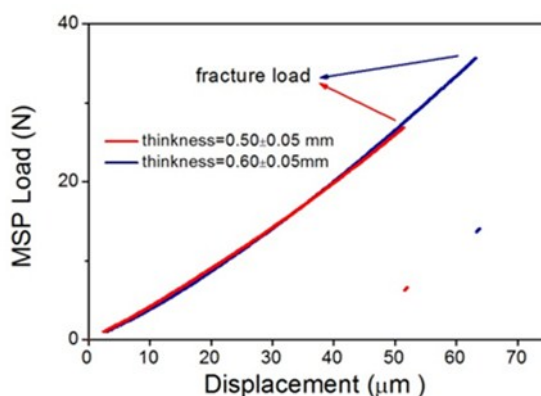

**Fig. S2** MSP load-displacement curves for  $L_{0.02}\text{KNN-6.5BZ-1BNT}$  sample.

It makes sense if the lead-free piezoelectric ceramics exhibit both considerable piezoelectricity and good mechanical property. And it is considered according to the experimental data as listed in Table 1 that the high density of the  $L_x\text{KNN-6.5BZ-1BNT}$

favors the high  $k_p$  value. The mechanical property is considered to be highly related to the microstructure. A modified small punch (MSP) method was used to evaluate the mechanical strength according to the following **Equation S1**:

$$\sigma_f = \frac{3P}{2\pi t^2} \left[ 1 - \frac{1-\nu^2}{4} \times \frac{b^2}{a^2} + (1+\nu) \times \ln \frac{a}{b} \right] \quad (S1)$$

where P is the fracture load, t is the thickness of the sample,  $\nu$  is the Poisson ratio, 2a is the diameter of the load-supporting hole of the lower die, and 2b is the diameter of the cylinder-shaped pressure head. The samples exhibit brittle fracture behavior. The fracture load P could be identified as an abrupt load decline occurs, before which a linear dependence of displacement is observed for the MSP load. The MSP fracture loads are  $P_1=26.8$  N with  $t_1=0.50$  mm,  $P_2=35.6$  N with  $t_2=0.60$  mm. The two observed MSP  $\sigma_f$  values are expected to be similar and are calculated to be 81MPa and 78MPa, respectively, which are larger than the previous reported KNN-based ceramics.<sup>[1]</sup>

### III. Translucent feature of $L_{0.02}$ KNN-6.5BZ-1BNT sample

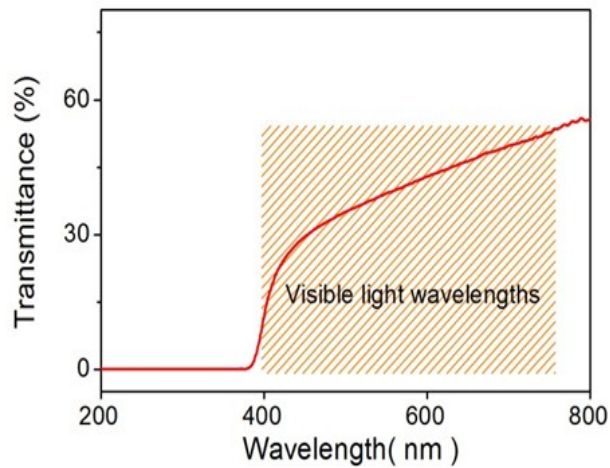

**Fig. S3** Optical transmittance spectra of  $L_{0.02}$ KNN-6.5BZ-1BNT sample of 0.35 mm in thickness. The optical transmittance reaches around 40% at the 633 nm wavelength.

### IV. Dielectric property

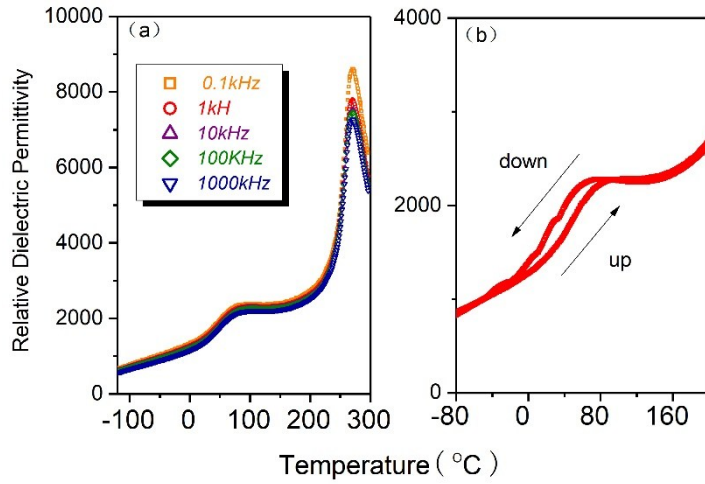

**Fig. S4** (a) the temperature-dependent permittivity of the  $x=0.02$  sample at different frequencies.(b) the temperature hysteresis.

## V. Piezoelectric property

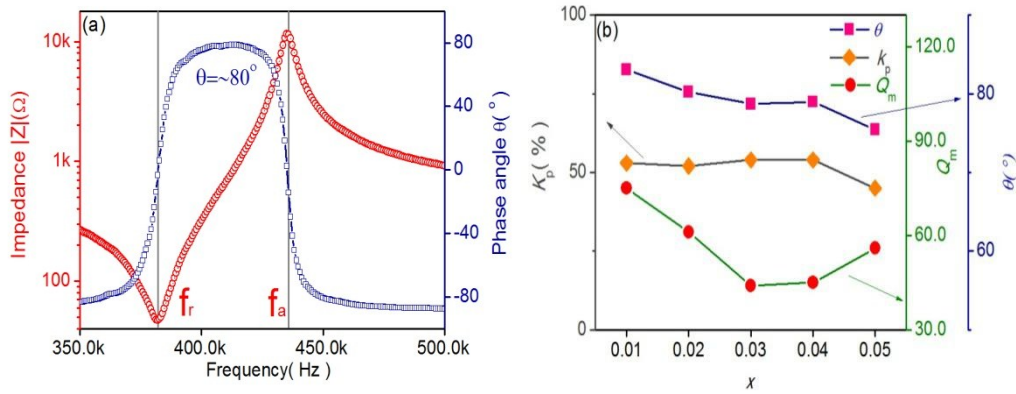

**Fig. S5** (a) The frequency dependence of the impedance and phase angle of  $L_{0.03}KNN-6.5BZ-1BNT$  samples. (b) Summarized results in  $\theta$ ,  $k_p$  and  $Q_m$  of  $L_xKNN-6.5BZ-1BNT$  ceramics as functions of Li contents.

It can be seen that the sample with  $x=0.03$  displays a square-like resonance peak, featured with both the resonance 381 kHz and anti-resonance frequency 435 kHz. It was calculated that the planar mode electromechanical coupling factor  $k_p$  could reach 54% according to the **Equation S2** as follows.

$$k_p = \frac{1}{\sqrt{0.395 \frac{f_r}{f_r - f_a} + 0.574}} \quad (S2)$$

## VI. Comparison of temperature dependence of piezoelectricity

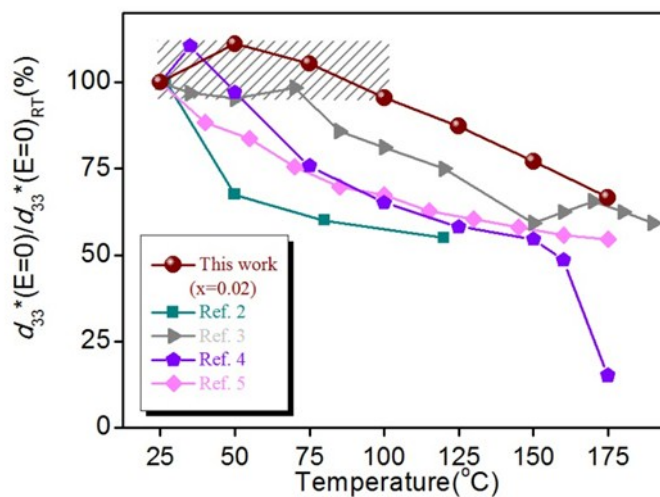

**Fig. S6** Comparison of temperature dependence of small signal  $d_{33}^*(E=0)$  for various ceramics as normalized to its room temperature value  $d_{33}^*(E=0)_{RT}$ .

## VII. Temperature dependence of ferroelectric property

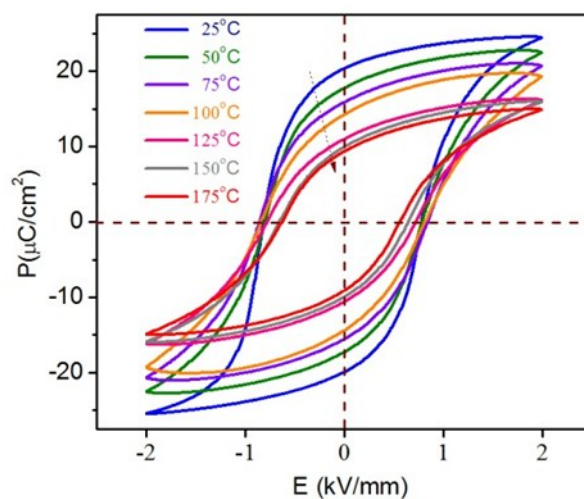

**Fig. S7** P-E loops of  $L_{0.02}KNN-6.5BZ-1BNT$  ceramics at different temperatures.

### Reference

- [1] Z. -Y. Shen, J. -F. Li, K. Wang, S. Xu, J. Wan and Q. Deng, *J. Am. Ceram. Soc.*, 2010, **93**, 1378-1383.

- [2] T. Zheng, H. Wu, Y. Yuan, X. Lv, Q. Li, T. Men, C. Zhao, D. Xiao, J. Wu, K. Wang, J.-F. Li, Y. Gu, J. Zhu and S. J. Pennycook, *Energ. Environ. Sci.*, 2017, **10**, 528-537.
- [3] M.-H. Zhang, K. Wang, Y.-J. Du, G. Dai, W. Sun, G. Li, D. Hu, H. C. Thong, C. Zhao, X.-Q. Xi, Z.-X. Yue, J.-F. Li, *J. Am. Chem. Soc.*, 2017, **139**, 3889-3895.
- [4] K. Wang, F.-Z. Yao, W. Jo, D. Gobeljic, V. V. Shvartsman, D. C. Lupascu, J.-F. Li, J. Rödel, *Adv. Funct. Mater.*, 2013, **23**, 4079-4086.
- [5] J.-S. Zhou, K. Wang, F.-Z. Yao, T. Zheng, J. Wu, D. Xiao, J. Zhu, J.-F. Li, *J. Mater. Chem. C*, 2015, **3**, 8780-8787.
